# Supplementary material for: Hierarchical Virtual Screening of Potential New Antibiotics from Polyoxygenated Dibenzofurans against Staphylococcus aureus Strains
Source: MDPI journal article supplement (doi:10.3390/ph16101430), 2023-10-09
Supplement: s1 [file s1]

# Hierarchical Virtual Screening of potential new antibiotics from polyoxygenated dibenzofurans against *Staphylococcus aureus* strains

Lana P. S. Oliveira <sup>1,2</sup>, Lúcio R. Lima <sup>2,3,4</sup>, Luciane B. Silva <sup>2,4</sup>, Jorddy N. Cruz <sup>2</sup>, Ryan S. Ramos <sup>1,2</sup>, Luciana S. Lima <sup>5</sup>, Francy M. N. Cardoso <sup>1,2,5</sup>, Aderaldo V. Silva <sup>1,2</sup>, Dália P. Rodrigues <sup>6</sup>, Gabriela S. Rodrigues <sup>7</sup>, Aldo A. Proietti-Junior <sup>1,5</sup>, Gabriela B. dos Santos<sup>7</sup>, Joaquín M. Campos <sup>8</sup> and Cleydson B. R. Santos <sup>1,2,3\*</sup>

<sup>1</sup> Graduate Program in Biotechnology and Biodiversity-Network BIONORTE, Federal University of Amapá, Macapá, 68903-419, AP, Brazil.

<sup>2</sup> Laboratory of Modeling and Computational Chemistry, Department of Biological and Health Sciences, Federal University of Amapá, Macapá 68902-280, AP, Brazil.

<sup>3</sup> Graduate Program in Network in Pharmaceutical Innovation, Federal University of Amapá, Macapá, 68902280, AP, Brazil.

<sup>4</sup> Graduate Program in Medicinal Chemistry and Molecular Modeling, Health Science Institute, Federal University of Pará, Belém 66075-110, Brazil.

<sup>5</sup> Special Laboratory of Applied Microbiology, Department of Biological and Health Sciences, Federal University of Amapá, Macapá 68902-280, AP, Brazil.

<sup>6</sup> Laboratory of Bacterial Enteric Pathogens, Oswaldo Cruz Institute, FIOCRUZ, 21045-900, Rio de Janeiro, Brazil.

<sup>7</sup> Graduate Program in Health Sciences, Institute of Collective Health, Federal University of Western Pará, Santarém, 68270-000, PA, Brazil.

<sup>8</sup> Department of Pharmaceutical and Organic Chemistry, Faculty of Pharmacy; Institute of Biosanitary Research ibs. GRANADA. University of Granada, 18071, Granada, Spain.

\* Correspondence: Cleydson B. R. Santos ([breno@unifap.br](mailto:breno@unifap.br))

## Supplementary Material

**Table S1.** Spatial Coordinates of the Pharmacophoric Model.

**Table S1.** Spatial Coordinates of the Pharmacophoric Model.

| Pharmacophoric Characteristics |      | Coordinated |        |        | Radius |
|--------------------------------|------|-------------|--------|--------|--------|
|                                |      | X           | Y      | Z      |        |
| Aromatic                       | ARO  | 9.426       | -7.548 | -0.150 | 1.10   |
| Hydrogen Acceptor              | ACC1 | 11.901      | -8.764 | -0.087 | 0.50   |
| Hydrogen Acceptor              | ACC2 | 11.873      | -4.029 | 0.064  | 0.50   |
| Hydrogen Acceptor              | ACC3 | 6.956       | -8.825 | -0.394 | 0.50   |
| Hydrogen Acceptor              | ACC4 | 9.563       | -4.761 | -0.045 | 0.50   |
| Hydrogen Donor                 | DON1 | 6.956       | -8.825 | -0.394 | 0.50   |
| Hydrogen Donor                 | DON2 | 9.563       | -4.761 | -0.045 | 0.50   |
